# Supplementary material
Source: PubMed Central journal article supplement (PMC3525980)
Supplement: mmc1.pdf [file mmc1.pdf]

# THE LANCET

## **Supplementary appendix**

This appendix formed part of the original submission and has been peer reviewed. We post it as supplied by the authors.

Supplement to: Pyae Phyo A, Nkhoma S, Stepniewska K, et al. Emergence of artemisinin-resistant malaria on the western border of Thailand: a longitudinal study. *Lancet* 2012; published online April 5. DOI:10.1016/S0140-6736(12)60484-X.

## **APPENDIX MATERIAL**

### **Emergence of artemisinin-resistant malaria on the western border of Thailand: a longitudinal study**

*Aung Pyae Phyo, Standwell Nkhoma, Kasia Stepniowska, Elizabeth A Ashley, Shalini Nair, Rose McGready, Carit ler Moo, Salma Al-Saai, Arjen Dondorp, Khin Maung Lwin, Pratap Singhasivanon, Nicholas P J Day, Nicholas J White, Tim J C Anderson, François Nosten*

#### *Contents:*

- Appendix 1. Geographical variation in clearance rate
- Appendix 2. Single nucleotide polymorphism genotyping
- Appendix 3. Age structure of patient population
- Appendix 4. Multiple regression analysis of clearance rate, stratified by location.
- Appendix 5. Genotyping data for one SNP.
- Appendix 6. Sampling breakdown for epidemiology and genetic analyses.
- Appendix 7. Genetic relatedness among parasites.
- Appendix 8. Change in heritability of clearance rates on the Thai-Myanmar border.
- Appendix 9. Permutation-based comparison of heritability in 2001-4 and 2007-10.

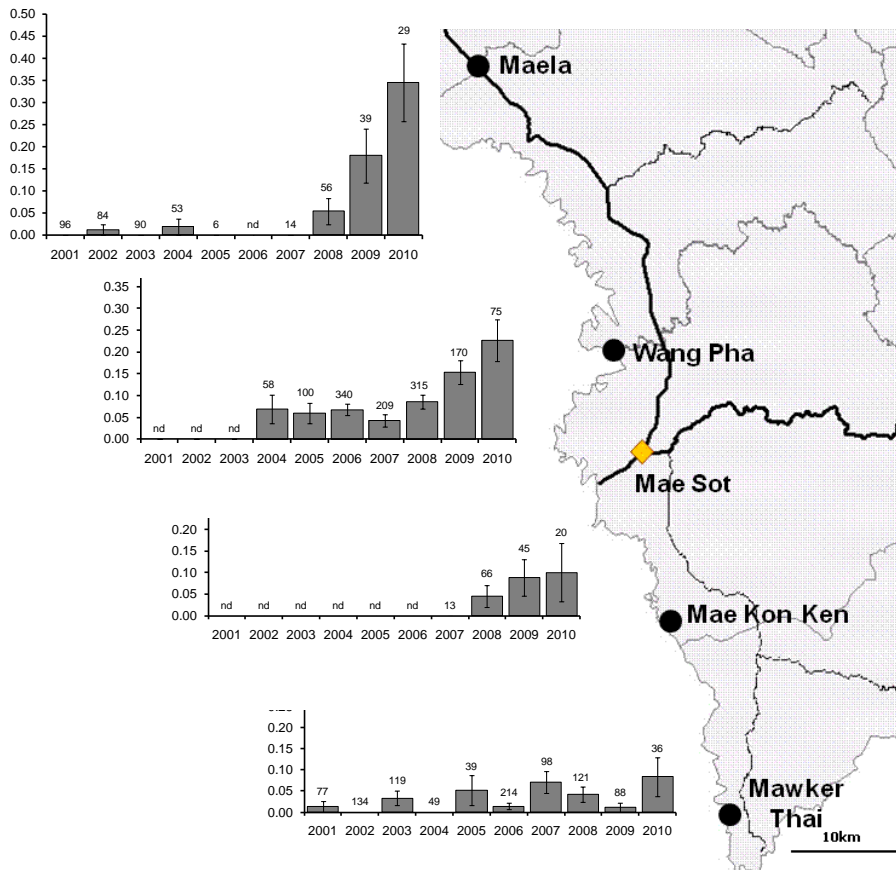

**Appendix 1. Geographical variation in  $t_{1/2} P$ .** The section of the Thai-Myanmar border containing the four study clinics is shown, with bar charts showing changes in the proportions of slow clearing parasites ( $t_{1/2} P \geq 6.2$  hrs) from 2001-10. Years in which no patients were treated are marked “nd”. There is a sharp rise in proportions of slow clearing parasites in clinics north of Maesot between 2008-10.



|               |                                                                                                                               |    |         |   |      |
|---------------|-------------------------------------------------------------------------------------------------------------------------------|----|---------|---|------|
| MAL13-2158308 | TTATTTTGTGTTGAATATATATCAACTCTTTGATGCATGTTCTGAAATTTTAAAGTAA[A/T]CTTTTTTTTTTTTATTCATGTCAATTTTCTGTCCAGTTCGTTTCATATATGATTTTGCA    | 13 | 2158308 | A | 0.26 |
| MAL13-2570163 | TATTAATTTAAAAGAATTTTTGAGTTCAAAAAAAGTATTTCATCTAAATTTGATTTTC[A/C]ATTATTGATTTAAAACATTTGATCAGAACAGTTCCTAGAGAAATTTAAATATTCATTATCT  | 13 | 2570163 | A | 0.46 |
| *MAL14-990875 | AGTAGTGTCTATAACAACATGCATCATAATATAAATCATCAAGAAAATTA[T/C]AGAAATCAAAACAGCTATAGCCACTTTTCGGTCAATGGTAGCTATATCGA                     | 14 | 990875  | G | 0.32 |
| MAL14-1199184 | TACAGTATATACTTTAAATATCTGTACCAAGGTAGATAAAAAATCTTCATATATATATGT[A/T]CCATTAGTTCGAACTTTATGTATTTCTGGACAATATTCACACTCCTATCCTTAATTTTA  | 14 | 1199184 | A | 0.38 |
| MAL14-1458321 | TAGTTGAATATGCTGAAGAGGTAGAATTAAGAAGAAGGTTGAAAAACATTTATGGGAG[A/G]AAAAGTTAATATGACAGAGAATCCGAGTGTTTTACATACAGCTTTAAGAATACCCATAGA   | 14 | 1458321 | G | 0.45 |
| MAL14-1757546 | AGAGGTACATATTAATAGATTTTTTAAATGAAAAATAGTAATAAAAAAATGTAACGCATG[A/G]TGATAGTGTATTACCAATGGTAATGAAACGGACGCGAAAAAATGTTGATGAGAATAA    | 14 | 1757546 | A | 0.32 |
| MAL14-1853537 | ATATGCTCGTATATCATTCAAAAATTAAGATGCATGATTATATCTGTAATAAGATGAGT[A/G]ACATTTATAAATACACAATTCAAATTTTTTAACATTTCAACAGGACTATTATTCAGGTAT  | 14 | 1853537 | A | 0.36 |
| MAL14-3017684 | ACACATCCAGAGGAGAGTATTTTCATCTTGAATAAGTCAATCCGTTAAACATTTCTGAAGAG[A/T]AGATCTATCTTTCTTTATCCAATAAAACATTTTCTCTCGGTTTCATATCATGAAGCGG | 14 | 3017684 | T | 0.37 |
| MAL14-3124926 | TGTGAAGAAGAAAAGAATTAATGGGAGCAGCTGGAGGAAGATATGTCGAAGAAGAGGTA[C/G]AGGGAGCAGTTGGAGGAAGAAATGTTGATGAAGAGGTAGAGGGAGCAGTTGGAGGAAGAA  | 14 | 3124926 | C | 0.34 |

### **Appendix 3. Age structure of patient population**

| <b>Age category (yrs)</b> | <b>Frequency</b> | <b>Percent</b> |
|---------------------------|------------------|----------------|
| <5                        | 666              | 20.8           |
| 5-15                      | 1109             | 34.63          |
| ≥15                       | 1427             | 44.57          |
| <b>Total</b>              | <b>3202</b>      | <b>100</b>     |

**Appendix 4. Multiple regression analysis of t1/2P, stratified by location.** Locations (from North to South) are Maela (MLA), Wang Pha (WPA), Mae Khon Ken (MKK) and Mawker Thai (MKT). The influence of patient age, prior malaria exposure, gender and sampling date on log t1/2P were examined using least squares regression in (A) all samples and (B) only patients with clearance data showing a good fit to a linear model ( $r^2 \geq 0.8$ ). In both analyses sampling date strongly influences t1/2P in three of the four locations (black shading, white text). Significance of associations with patient age, gender and malaria exposure do not fall below  $p=0.025$  and fail to reach Bonferroni corrected table-wide significance levels ( $0.05/16=0.003$ ) in both analyses.

**(A) t1/2P measures calculated from slopes with  $r^2 > 0.8$  only**

|                               | MLA           | n=433          | WPA           | n=1244         | MKK   | n=141 | MKT           | n=931          |
|-------------------------------|---------------|----------------|---------------|----------------|-------|-------|---------------|----------------|
|                               | F             | p              | F             | p              | F     | p     | F             | p              |
| Admission Date                | <b>82.834</b> | <b>8.9E-20</b> | <b>12.678</b> | <b>3.7E-04</b> | 0.943 | 0.332 | <b>14.123</b> | <b>1.7E-04</b> |
| Age (yrs)                     | 1.440         | 0.230          | 2.686         | 0.101          | 0.232 | 0.630 | 0.005         | 0.944          |
| Malaria exposure <sup>1</sup> | 0.016         | 0.899          | 2.457         | 0.117          | 0.287 | 0.592 | 4.512         | 0.034          |
| Gender                        | 3.301         | 0.069          | 0.639         | 0.424          | 1.827 | 0.176 | 0.748         | 0.387          |

**(B) All data**

|                               | MLA           | n=444          | WPA           | n=1346         | MKK   | n=150 | MKT           | n=1038         |
|-------------------------------|---------------|----------------|---------------|----------------|-------|-------|---------------|----------------|
|                               | F             | p              | F             | p              | F     | p     | F             | p              |
| Admission Date                | <b>79.154</b> | <b>5.7E-19</b> | <b>13.430</b> | <b>2.5E-04</b> | 0.292 | 0.589 | <b>13.572</b> | <b>2.3E-04</b> |
| Age (yrs)                     | 1.722         | 0.189          | 1.121         | 0.290          | 0.441 | 0.507 | 0.341         | 0.559          |
| Malaria exposure <sup>1</sup> | 0.003         | 0.956          | 4.086         | 0.043          | 0.255 | 0.614 | 3.945         | 0.047          |
| Gender                        | 5.006         | 0.025          | 0.661         | 0.416          | 2.605 | 0.107 | 0.028         | 0.867          |

<sup>1</sup>Malaria exposure was defined by a documented malaria episode prior to the current episode.

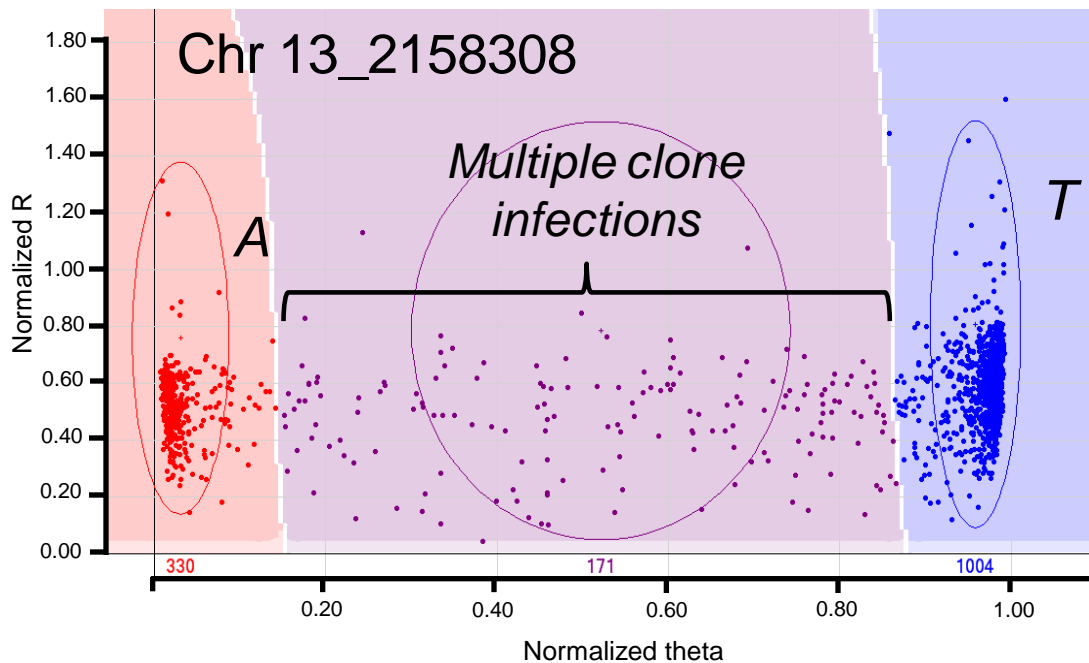

**Appendix 5. Genotyping data for one SNP.** A typical SNP graph for the A/T SNP on chromosome 13, position 2158308, showing clustering of samples based on their genotypes. Genotype calls are made based on the normalized ratio of fluorescence intensity signals for the “A” and the “B” allele in the sample. The X-axis shows Norm Theta values, which correspond to the composition of the “B” allele in each sample. Multiple-clone infections are easily identified and were excluded from CR heritability analysis.



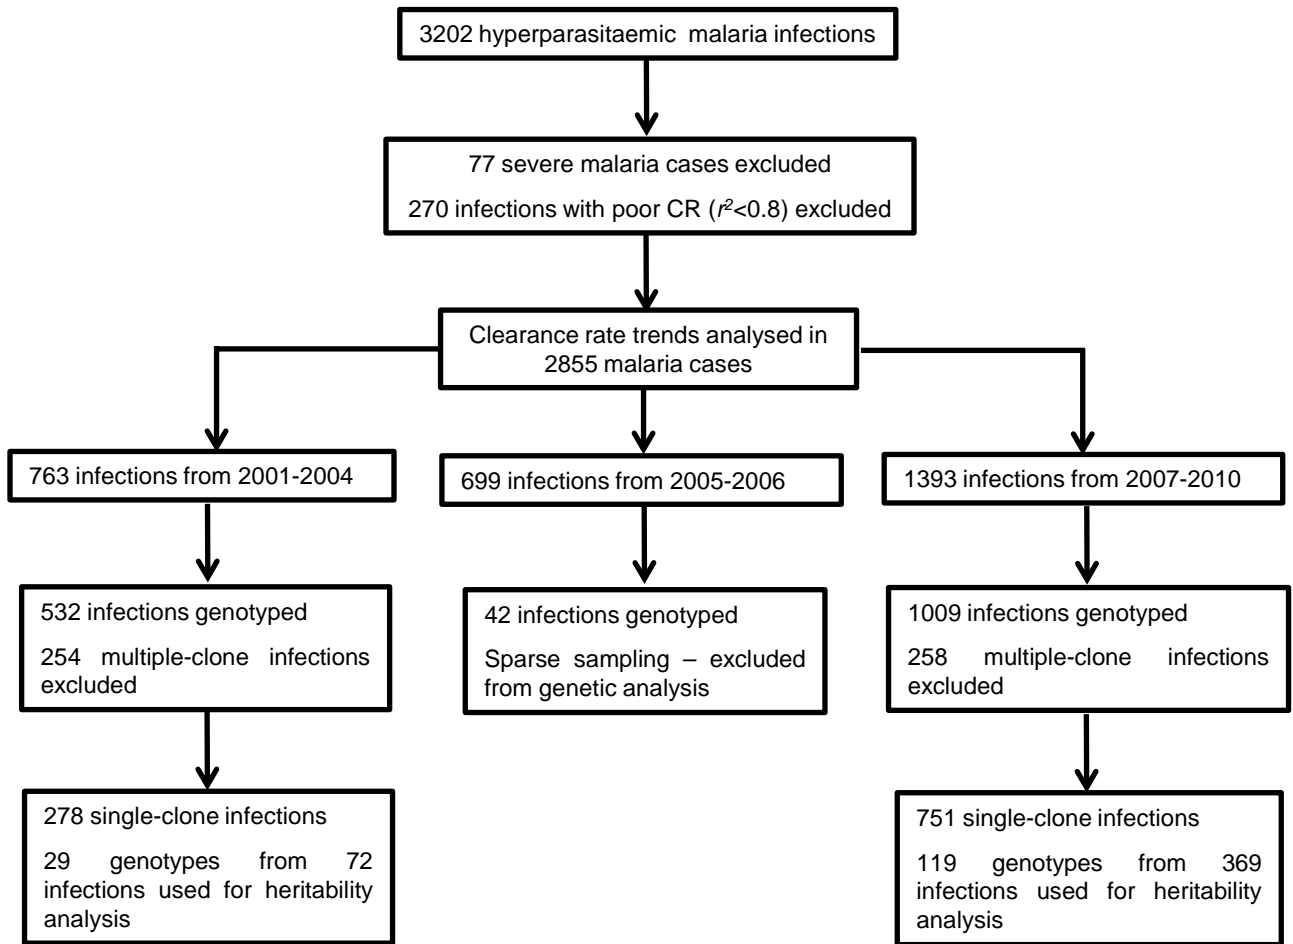

**Appendix 6. Sampling breakdown for epidemiology and genetic analyses.** Exclusion criteria are detailed in the text. The flow chart details how parasites with identical 93-locus genotypes infecting multiple patients were identified in the data set.

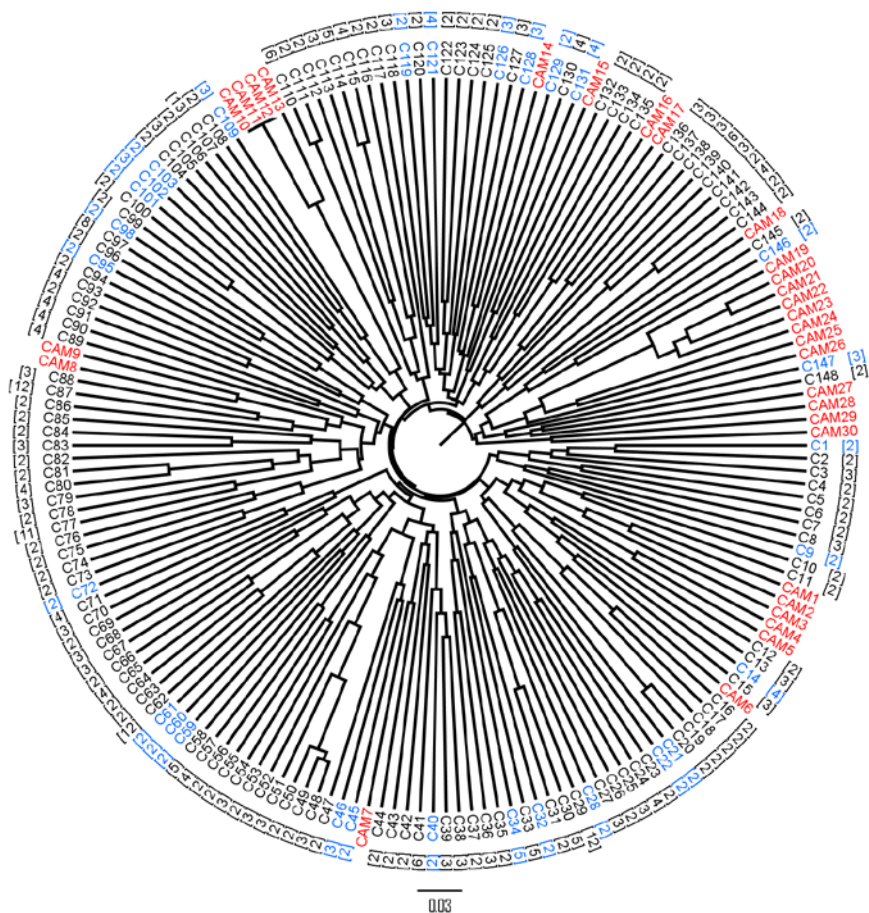

**Appendix 7. Genetic relatedness among parasites.** The tree shows the relatedness among 148 93-locus parasite genotypes infecting 441 patients. Blue genotype labels indicate infections collected between 2001 and 2004, black labels those collected from 2007-2010, while red labels show 30 infections from Cambodia. The numbers of patients infected with each genotype are shown in square brackets.

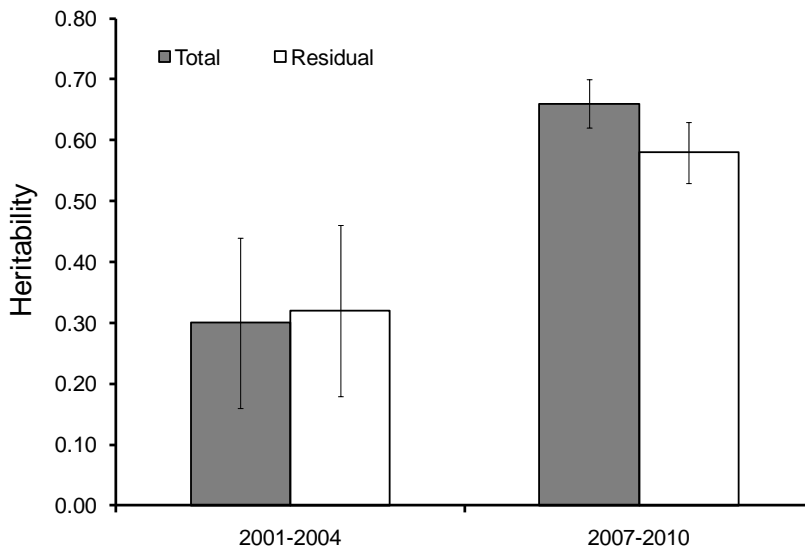

**Appendix 8. Change in heritability of clearance rates on the Thai-Myanmar border.** The proportion of variation in  $t_{1/2} P$  that is due to parasite genetic factors (heritability) is shown for 2001-4 and 2007-10 time windows. Grey bars show heritability of  $t_{1/2} P$ , while white bars show heritability analysis of residuals after removing effects of significant covariates. The error bars are 1 SD. The increase in heritability observed between 2001-4 and 2007-10 periods were tested by permutation (Appendix 9) and were significant for both  $t_{1/2} P$  ( $p < 0.01$ ) and residuals ( $p = 0.04$ ).

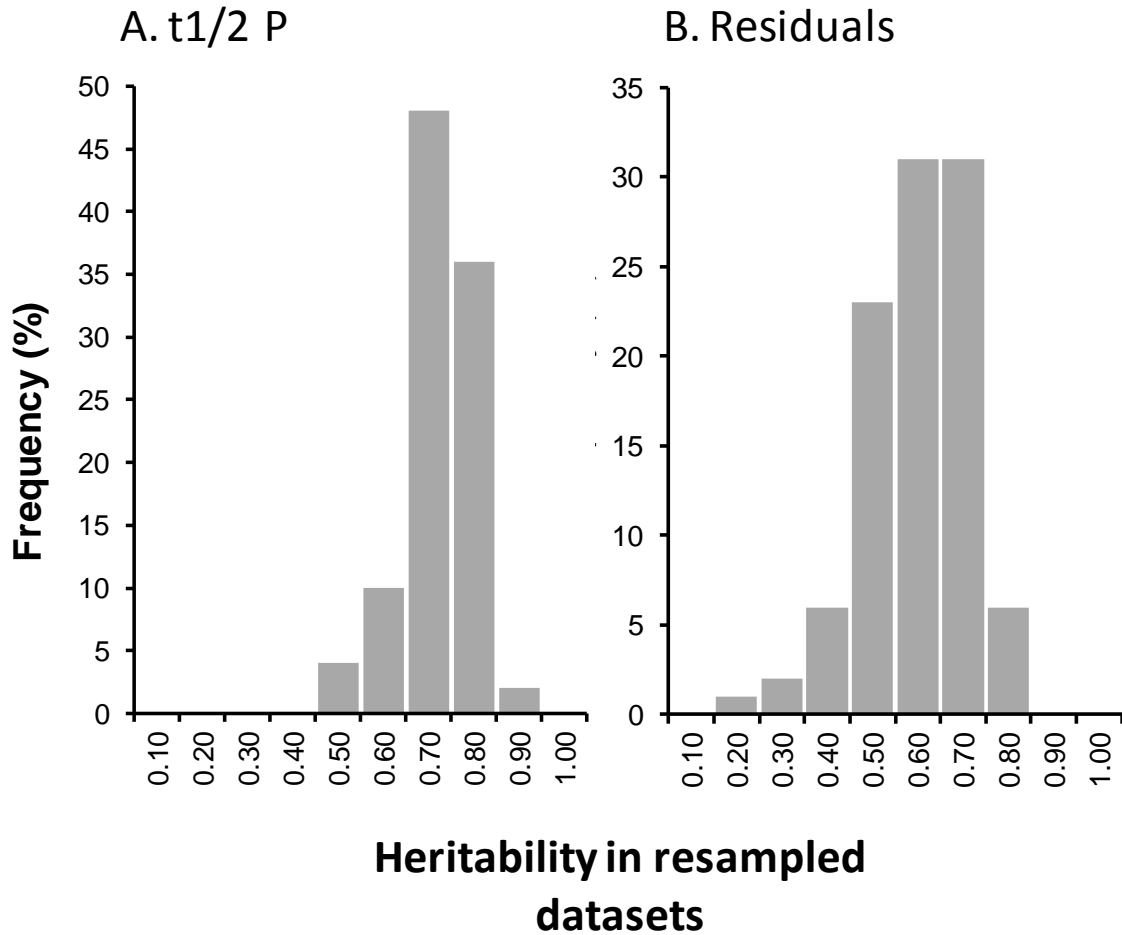

**Appendix 9. Permutation-based comparison of heritability in 2001-4 and 2007-10.** In 2001-4, 29 groups of patients are infected with indistinguishable parasite genotypes, while in 2007-10, there were 119 groups. We randomly resampled 250 patients from 2007-10 generating samples containing on average 29 parasite genotypes infecting >1 patient. This resampling exercise provides a direct comparison with the 2001-4 period. Heritability estimates from 100 resampled 2007-10 datasets (range=0.48-0.85 exceeded that observed in 2001-4, demonstrating that the observed increase in  $H^2$  is significant ( $p < 0.01$ ). For residuals (following removal of effects of covariates) all but 4 resampled datasets exceeded  $H^2$  values for 2001-4 ( $p = 0.04$ ). These analyses are shown below. The frequency distribution shows  $H^2$  values from 100 resampled 2007-10 datasets for A.  $t_{1/2}P$  measures and B. residuals.
